# Supplementary material for: Trehalose-8-hydroxyquinoline conjugates as antioxidant modulators of Aβ aggregation
Source: Royal Society of Chemistry journal article supplement (doi:10.1039/c6ra04204j), 2016-01-01
Supplement: c6ra04204j1.pdf [file c6ra04204j1.pdf]

## Supporting Information

### Trehalose-8-hydroxyquinoline conjugates as antioxidant modulators of protein aggregation

Valentina Oliveri,<sup>a,b</sup> Francesco Bellia,<sup>c</sup> Giuseppa Ida Grasso,<sup>c</sup> Adriana Pietropaolo<sup>d</sup> and Graziella Vecchio<sup>a,\*</sup>

<sup>a</sup> Dipartimento di Scienze Chimiche, Università di Catania, Viale A. Doria 6, 95125, Catania (Italy)

<sup>b</sup> Consorzio Interuniversitario di Ricerca in Chimica dei Metalli nei Sistemi Biologici C.I.R.C.M.S.B, Unità di Ricerca di Catania

95125 Catania (Italy)

<sup>c</sup> Istituto di Biostrutture e Bioimmagini, CNR, Via P. Gaifami 18, 95126 Catania, Italy

<sup>d</sup> Dipartimento di Scienze della Salute, Università di Catanzaro, Viale Europa, 88100 Catanzaro, Italy

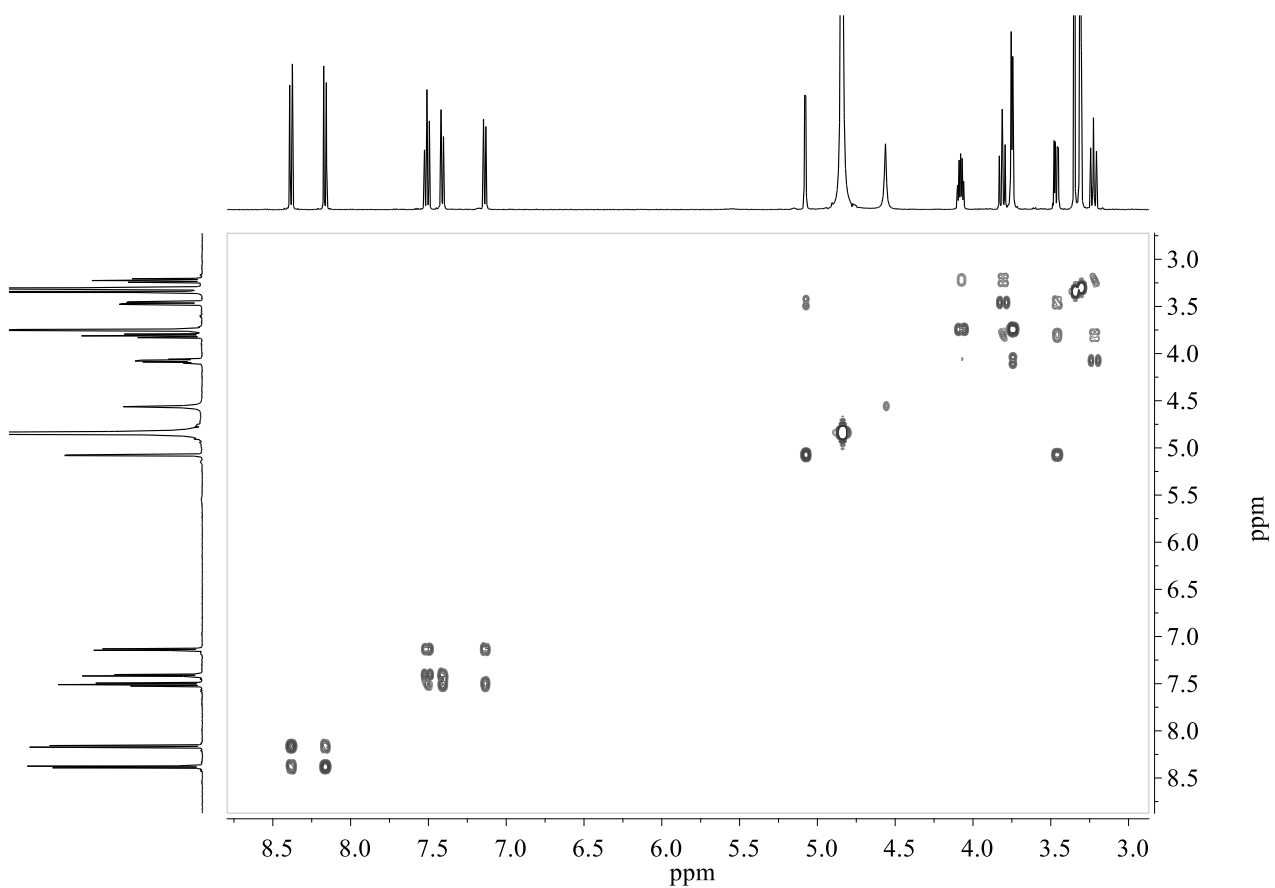

Figure S1. <sup>1</sup> COSY spectrum of Tre(HQ)<sub>2</sub> in CD<sub>3</sub>OD at 500 MHz

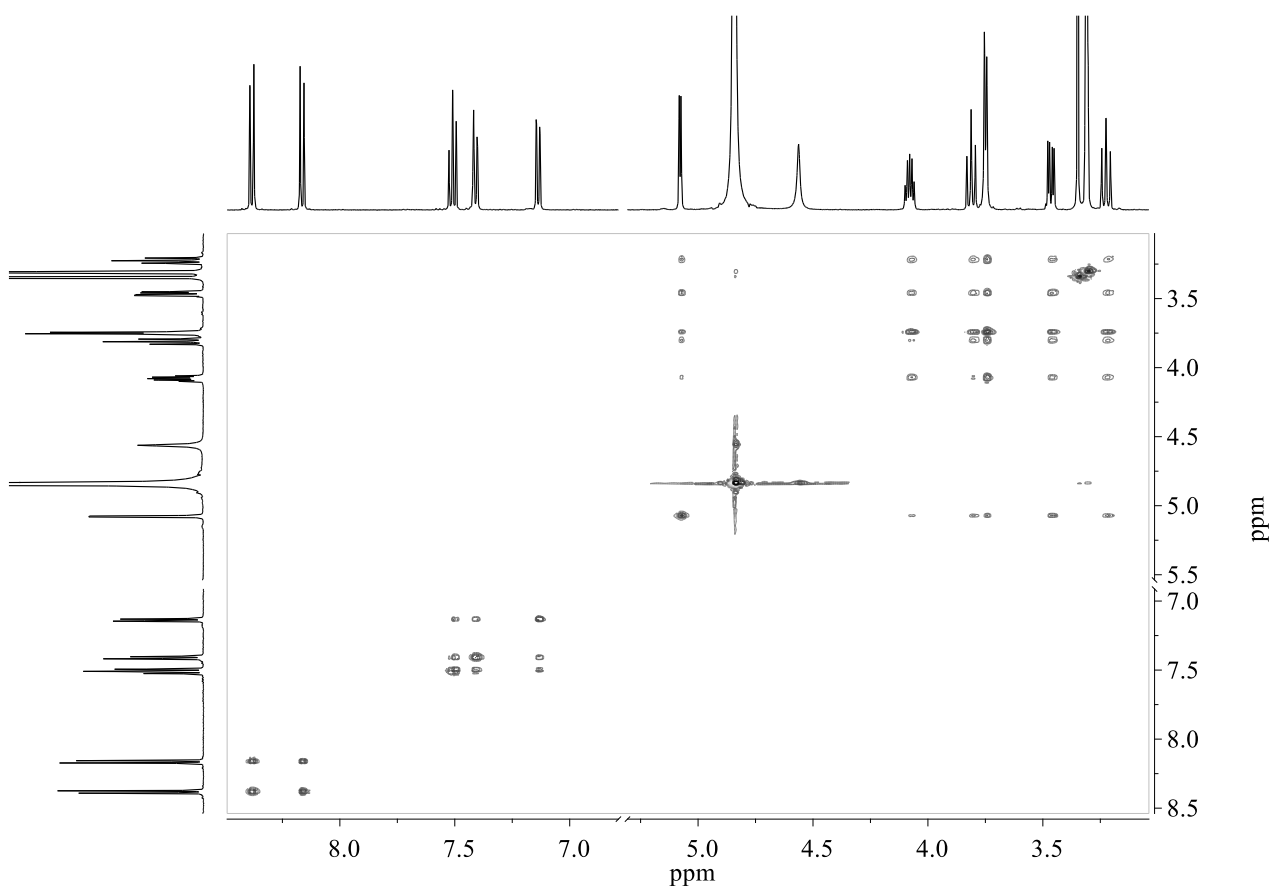

**Figure S2. TOCSY spectrum of Tre(HQ)<sub>2</sub> in CD<sub>3</sub>OD at 500 MHz.**

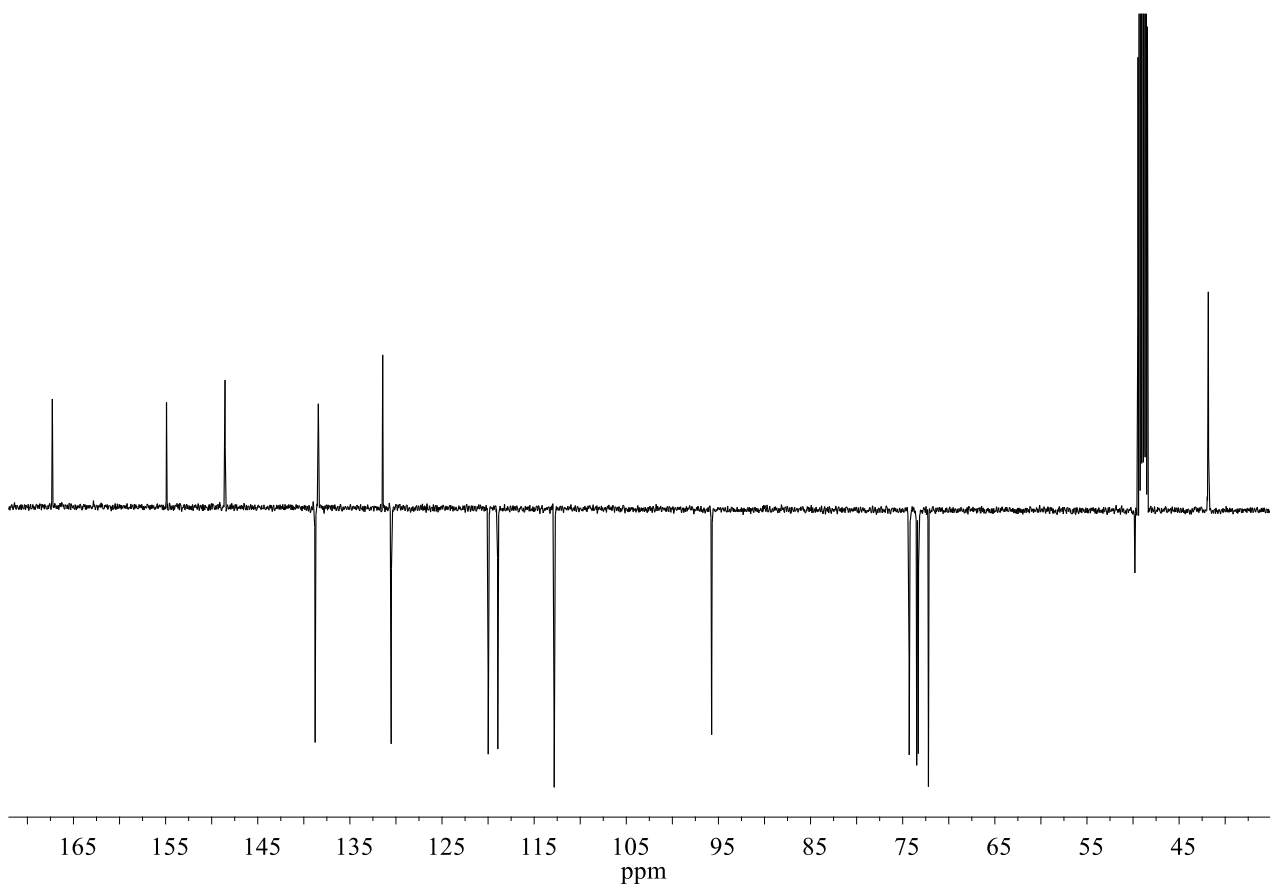

**Figure S3.**  $^{13}\text{C}$  NMR spectrum of Tre(HQ)<sub>2</sub> in CD<sub>3</sub>OD at 125 MHz.

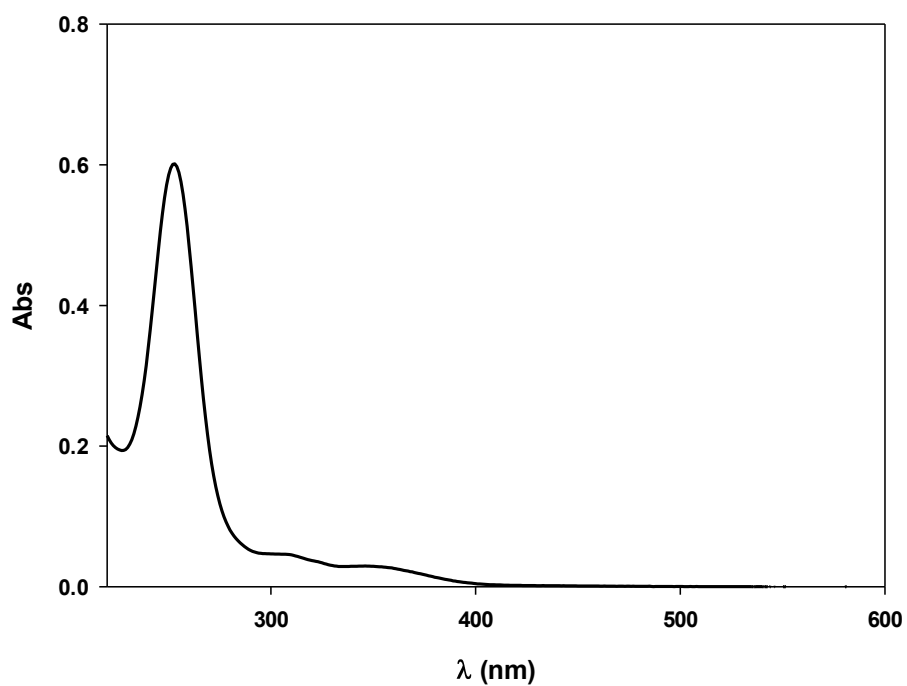

Figure S4. UV-vis spectra of Tre(HQ)<sub>2</sub> ( $C_L=3.0 \times 10^{-5}$  M) in MOPS (10 mM, pH 7.4).

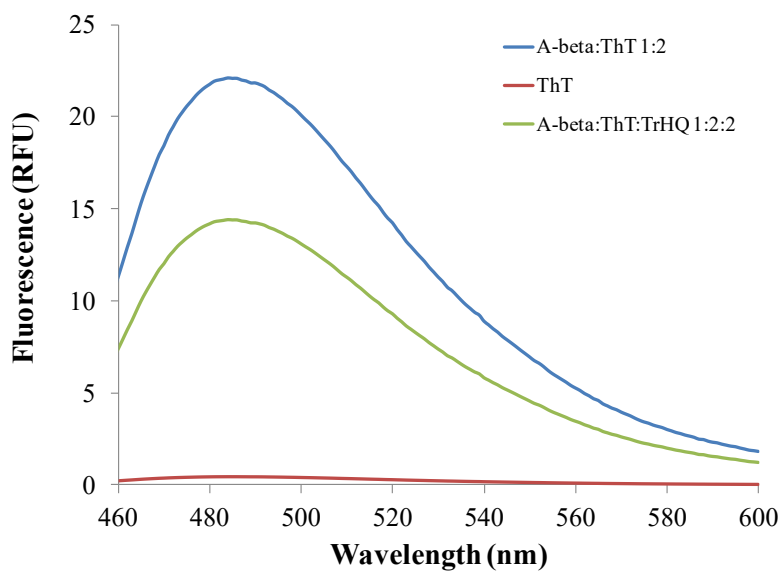

Figure S5. Fluorescence spectra of the dye alone (ThT), with A $\beta$ 1-42 (A-beta) and in the presence of TreHQ after 24h of incubation at 37°C.

**Table S1. Kinetic parameters related to the aggregation of A $\beta$ <sub>1-42</sub> in the presence of the HQ glycoconjugates (TreHQ, Tre(HQ)<sub>2</sub>), Tre and HQ alone and mixed at 1:1 (Tre+HQ) or 1:2 (Tre+HQ) molar ratios. the A $\beta$ /compound(mixed compounds) ratio was 1:2. The aggregation of A $\beta$  alone is the control sample (CTRL). All results are expressed as mean  $\pm$  standard deviation (SD).**

|                    | $F_{max} - F_0$<br>(RFU) | $k$<br>(h)    | $t_{lag}$<br>(h) |
|--------------------|--------------------------|---------------|------------------|
| A $\beta$          | 21.0 $\pm$ 0.3           | 1.3 $\pm$ 0.2 | 9.7 $\pm$ 0.3    |
| A $\beta$ +TreHQ   | 14.2 $\pm$ 0.2           | 1.8 $\pm$ 0.2 | 12.4 $\pm$ 0.3   |
| A $\beta$ +Tre+HQ  | 15.8 $\pm$ 0.1           | 1.4 $\pm$ 0.1 | 12.2 $\pm$ 0.2   |
| A $\beta$ +Tre+2HQ | 13.1 $\pm$ 0.5           | 3.8 $\pm$ 0.3 | 13.2 $\pm$ 0.8   |
| A $\beta$ +Tre     | 18.2 $\pm$ 0.4           | 3.9 $\pm$ 0.5 | 15.2 $\pm$ 0.3   |
| A $\beta$ +HQ      | 17.6 $\pm$ 0.3           | 1.3 $\pm$ 0.1 | 12.5 $\pm$ 0.4   |
